# Supplementary material for: A Facile, One-Pot, Surfactant-Free Nanoprecipitation Method for the Preparation of Nanogels from Polyglycerol–Drug Conjugates that Can Be Freely Assembled for Combination Therapy Applications
Source: PubMed Central journal article supplement (PMC6415236; doi:10.3390/polym10040398), 2018-04-03
Supplement: polymers-10-00398-s001.pdf [file polymers-10-00398-s001.pdf]

Supporting Information for

# **A Facile, One-Pot, Surfactant-Free Nanoprecipitation Method for the Preparation of Nanogels from Polyglycerol–Drug Conjugates that Can Be Freely Assembled for Combination Therapy Applications**

**Laura I. Vossen, Stefanie Wedepohl and Marcelo Calderón \***

Freie Universität Berlin, Institut für Chemie und Biochemie, Takustrasse 3, 14195 Berlin, Germany;  
laura.vossen@fu-berlin.de (L.I.V.); stefanie.wedepohl@fu-berlin.de (S.W.)

\* Correspondence: marcelo.calderon@fu-berlin.de; Tel.: 49-30-838-59-368

**Table S1.** PG-DOX-PTX NGs prepared with PG-DOX-PTX-SH conjugate as precursor and at different conditions.

|               | c [monomers] | Acetone (mL) | d [nm] water | PDI  |
|---------------|--------------|--------------|--------------|------|
| PG-DOX-PTX NG | 10 mg/ 1 mL  | 40           | 262          | 0.10 |
| PG-DOX-PTX NG | 5 mg/ 1 mL   | 20           | 227          | 0.39 |
| PG-DOX-PTX NG | 5 mg/ 2 mL   | 40           | 221          | 0.33 |

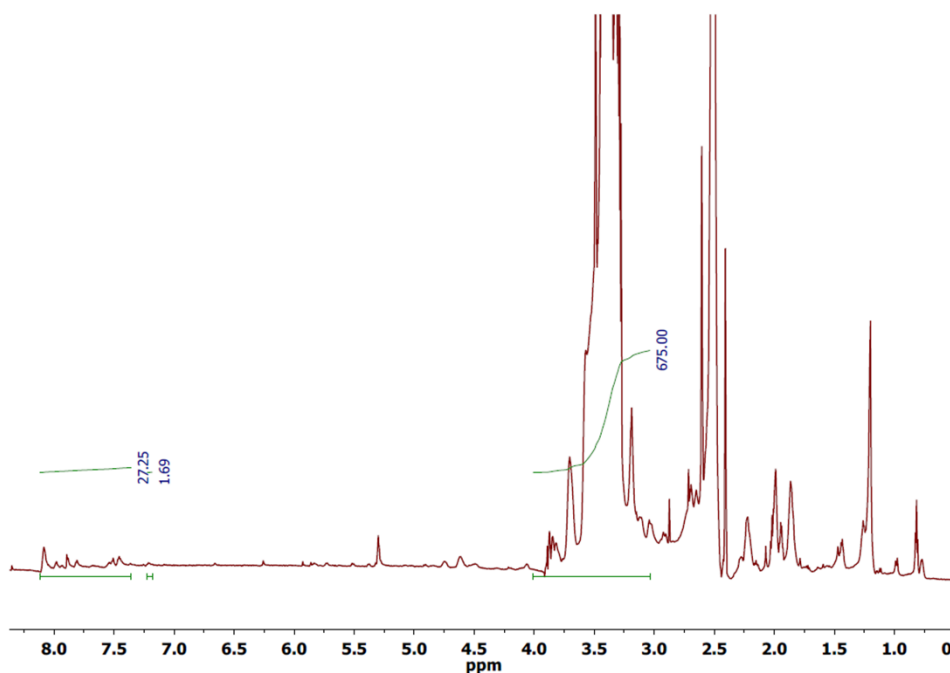

**Figure S1.**  $^1\text{H-NMR}$  spectrum ( $\text{DMSO-d}_6$ ) of macromonomer PG-PTX-SH (10%) conjugate.

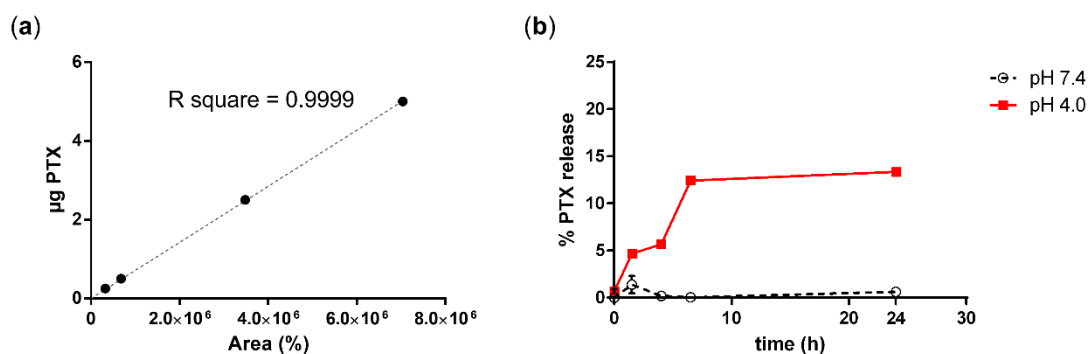

**Figure S2.** (a) Calibration curve for PTX in acetonitrile measured by RP-HPLC at a retention time of 2.85 min with acetonitrile-water (65:35) as mobile phase at a flow rate of  $1.0 \text{ mL min}^{-1}$  under isocratic regime. The injection volume was  $50 \mu\text{L}$ . (b) Representative release profile of PG-PTX-DOX NG at pH 4.0 and 7.4 at  $37 \text{ }^\circ\text{C}$  over 25 h. The PTX release (%) was quantified by RP-HPLC. Mean  $\pm$  SEM were obtained from triplicates in three independent experiments.

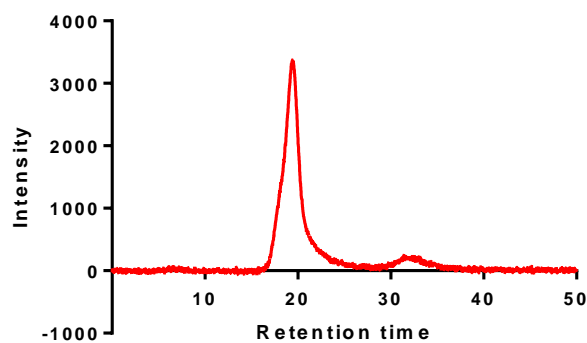

**Figure S3.** GPC chromatogram of NG3 at 480 nm.

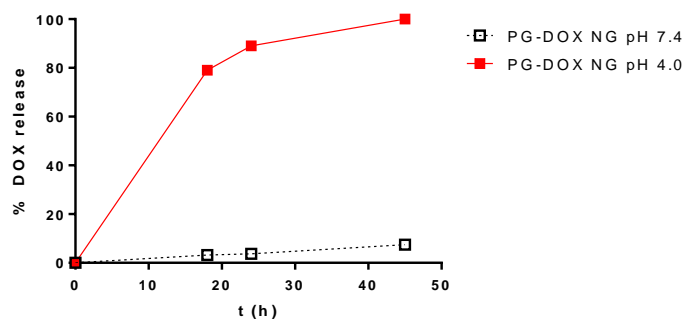

**Figure S4.** Representative release profile of PG-DOX NG at pH 4.0 and 7.4 over 45 h and calculated from the fluorescence spectra (Figure 8a and b) at 592 nm. The fluorescence intensity value at 45 h was set to 100% and the value at time point 0 to 0%.

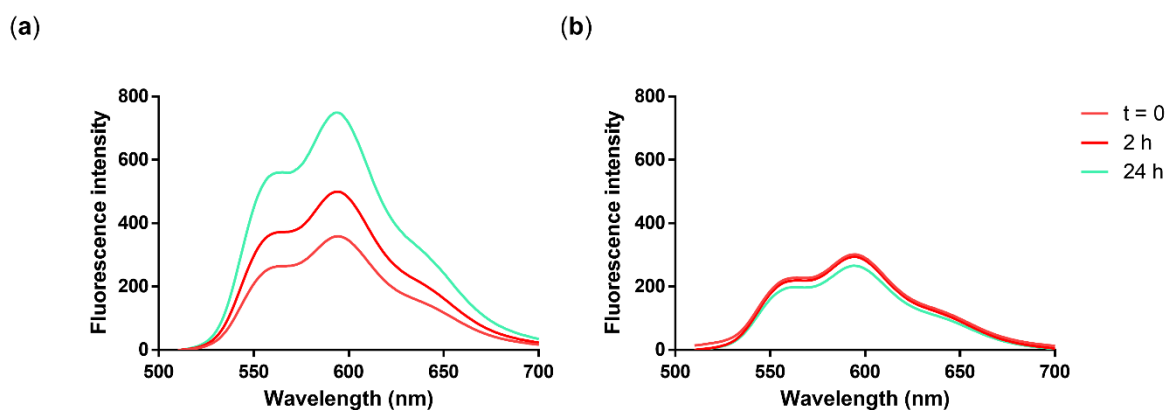

**Figure S5.** Fluorescence emission spectra of PG-DOX-SH conjugate after incubation in (a) acetate buffer (pH 4.0, 50 mM) and (b) phosphate buffer (pH 7.4, 50 mM) at 37 °C over 24 h.
